# Supplementary material
Source: PubMed Central journal article supplement (PMC3064191)
Supplement: supp_M110.195925_jbc.M110.195925-1.pdf [file supp_M110.195925_jbc.M110.195925-1.pdf]

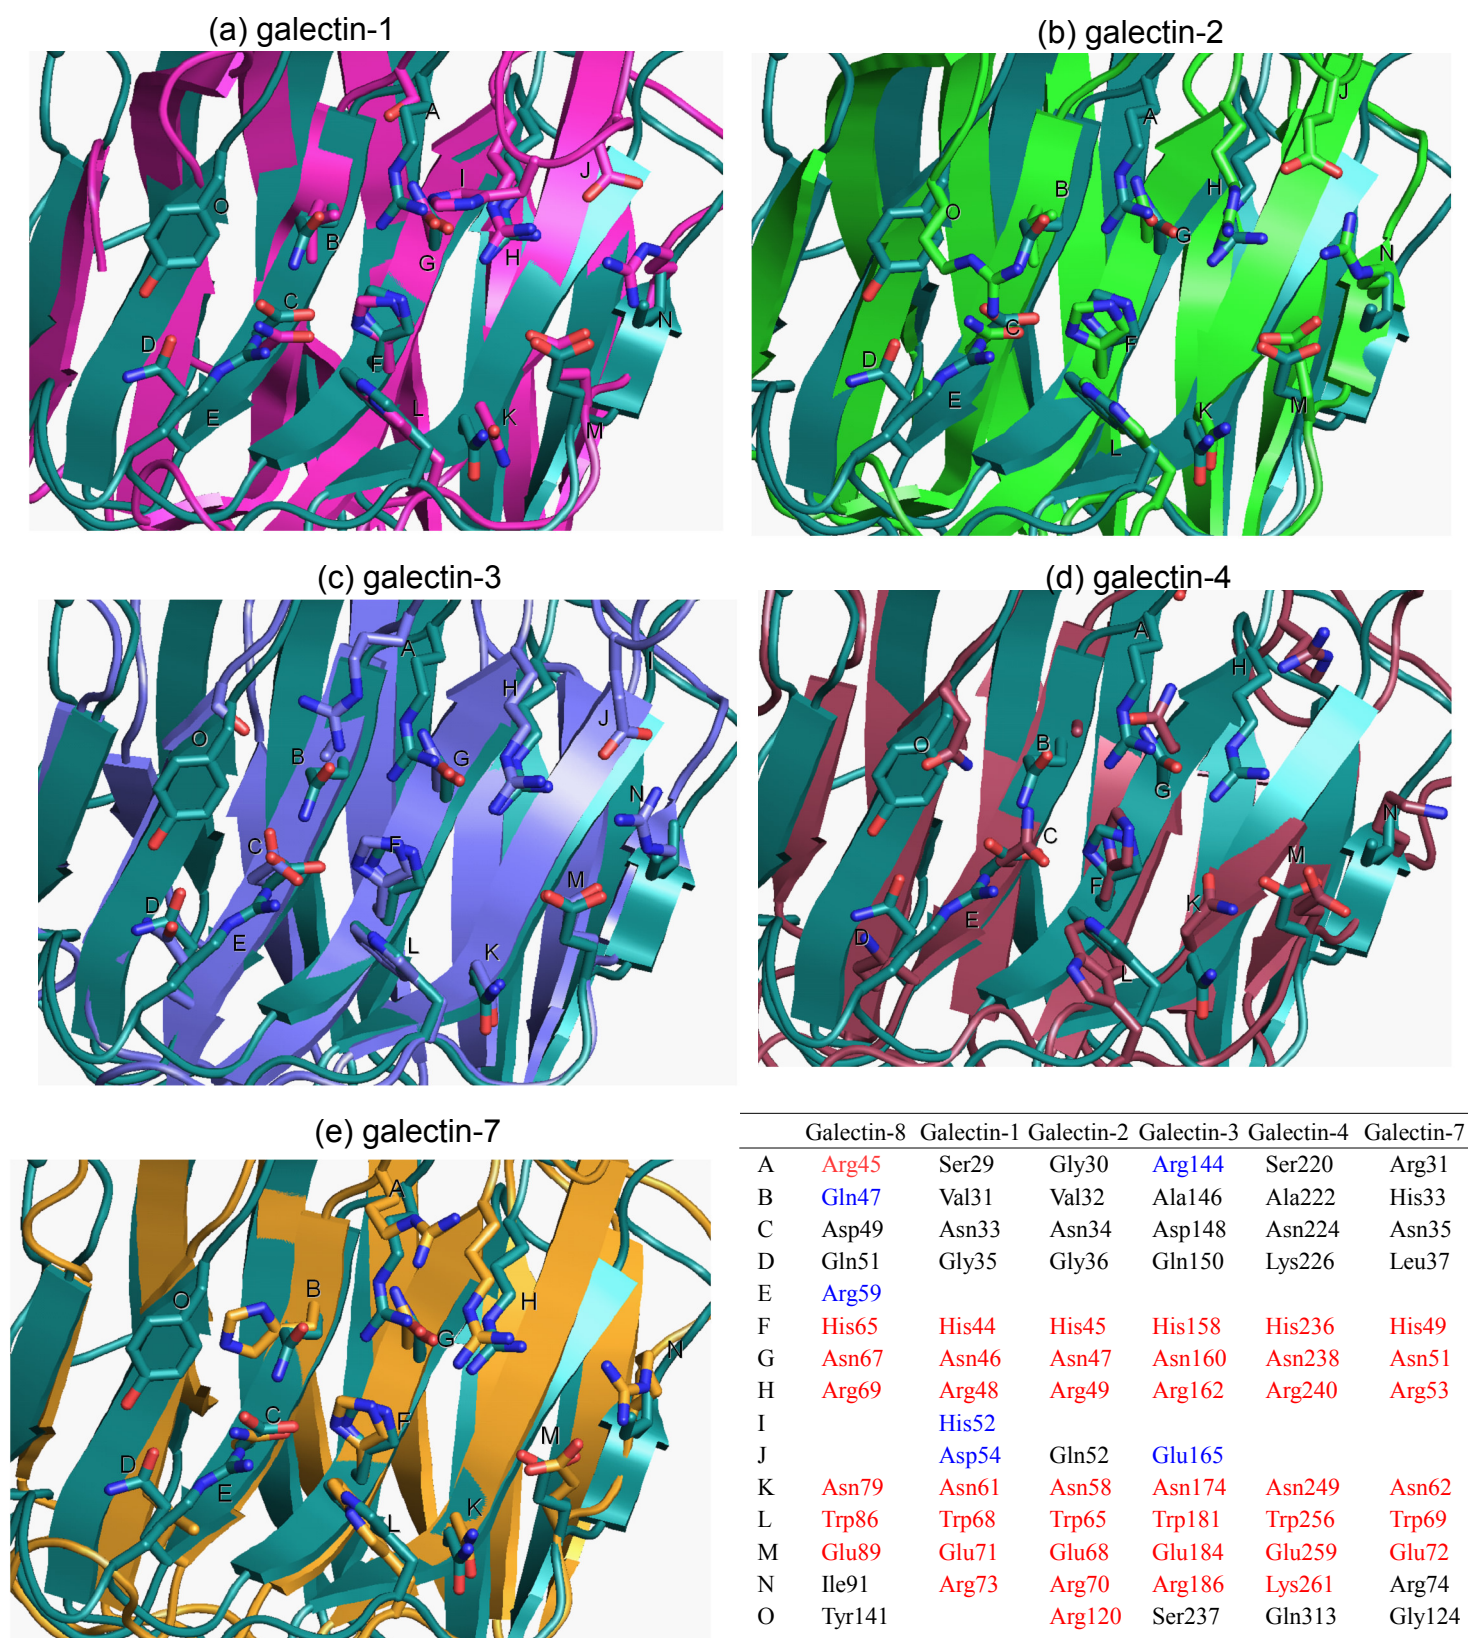

Fig. S1.



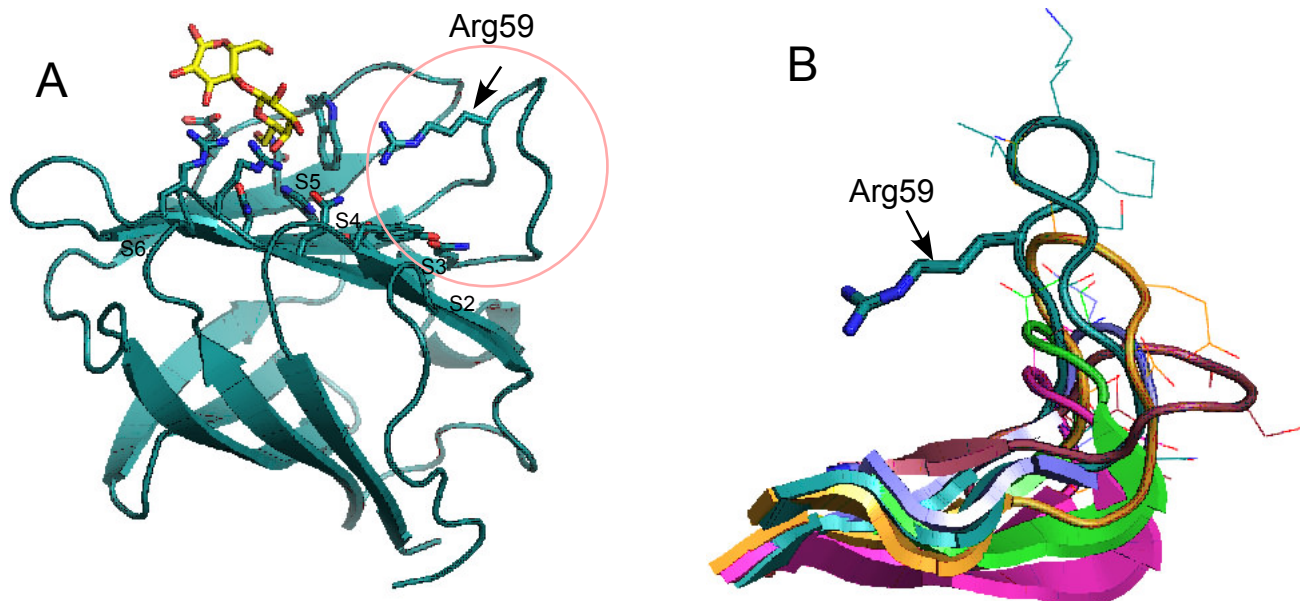

Fig. S2.

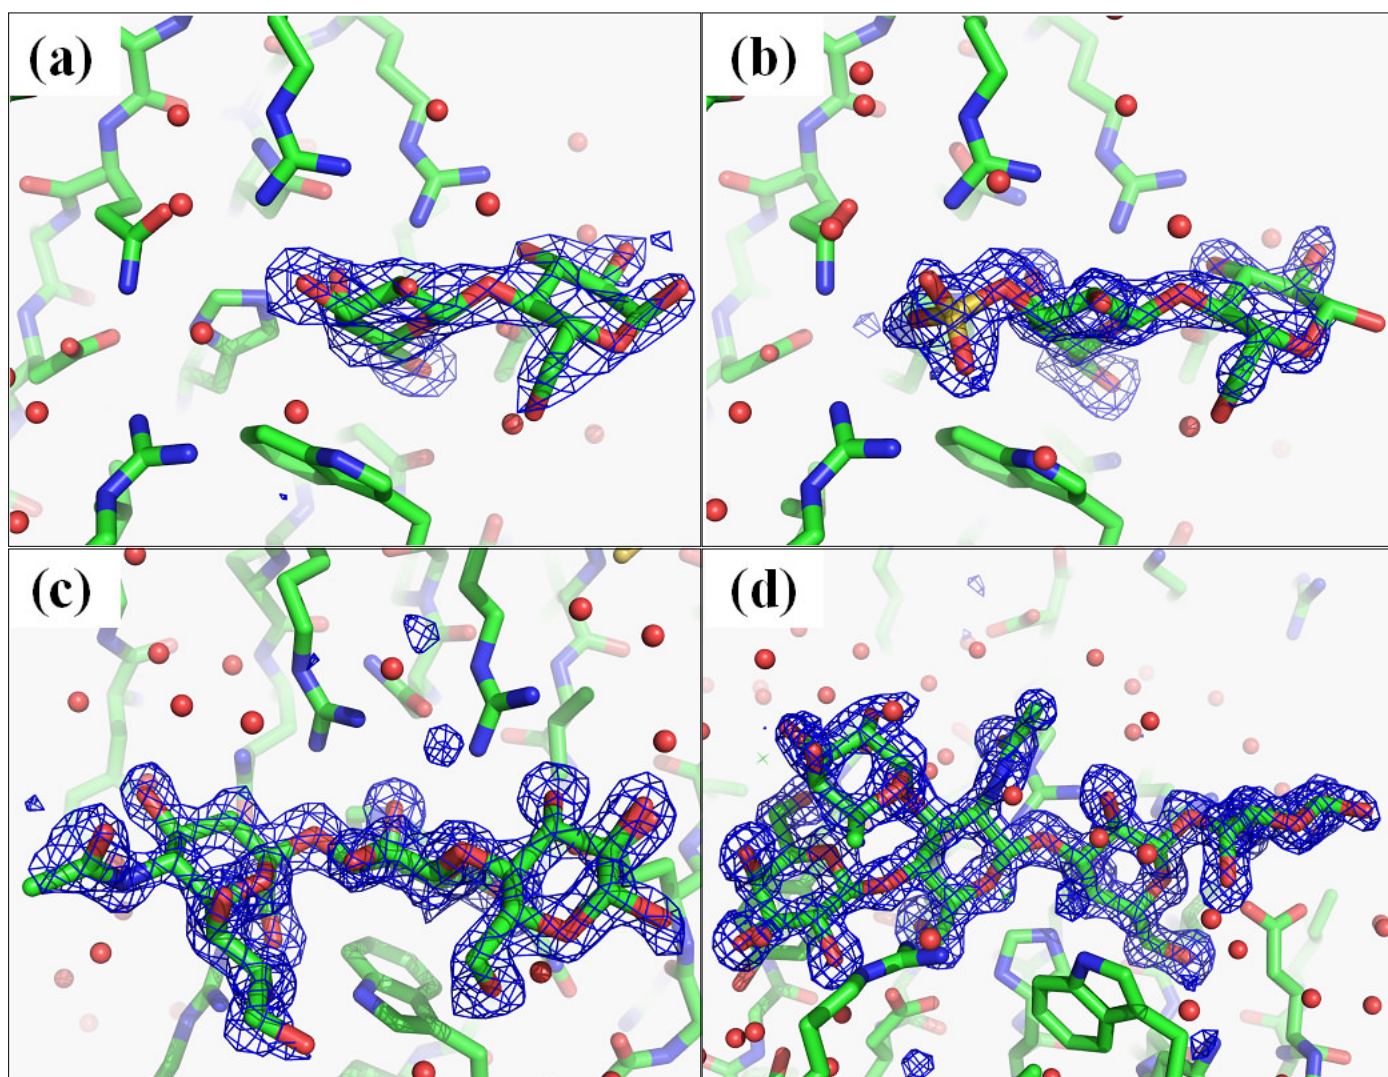

Fig. S3.

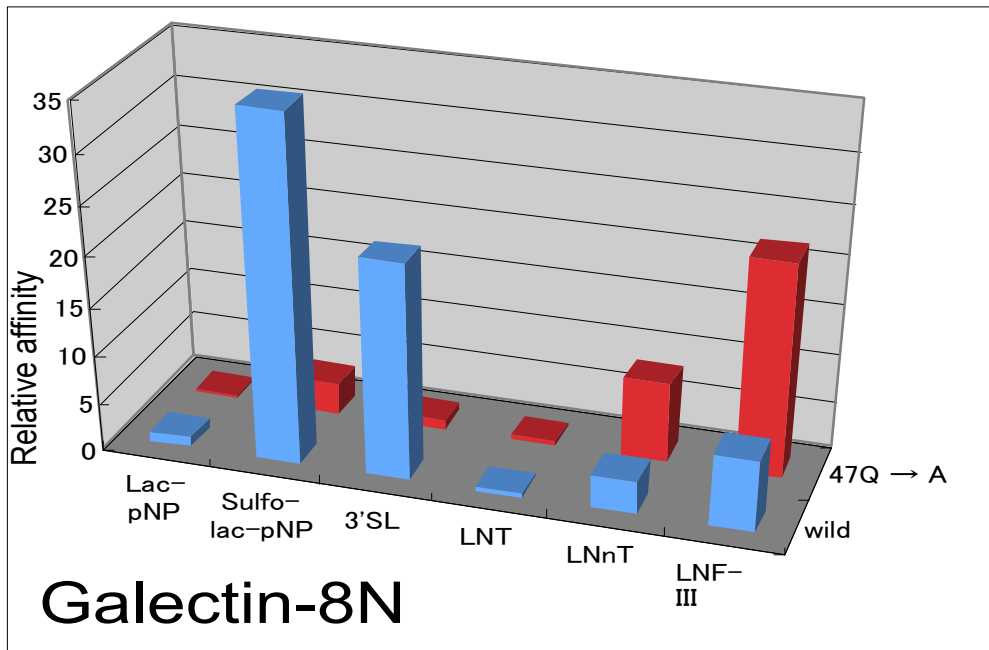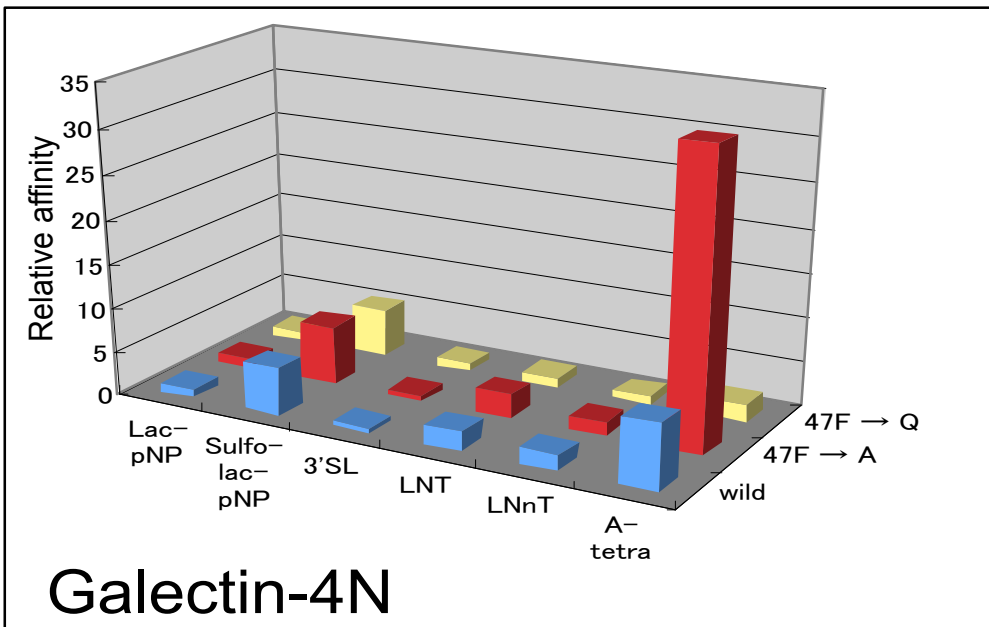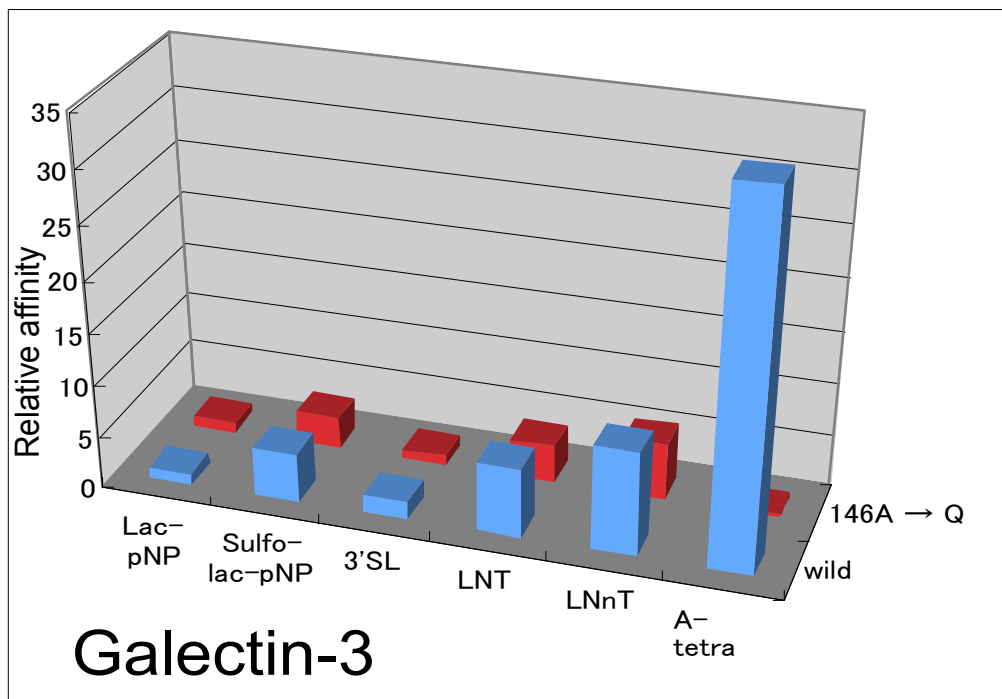

Fig.S4

### Supplemental Figure Legends

**Fig. S1.** The backbone structures are shown in a ribbon model and amino acids involved in carbohydrate recognition are shown in a stick model. Galectin-8N is shown in blue-green and other galectins are shown in different colors (galectin-1: pink, galectin-2: yellow-green, galectin-3: blue, galectin-4: red, galectin-7: ocher). Amino acids that directly interact with lactose are shown in red, and amino acids that interact with lactose via water-mediated hydrogen bonds are shown in blue. (a) Comparison with galectin-1 [PDB-ID: 1GZW, (1), RMSD: 0.32 Å] (b) Comparison with galectin-2 [PDB-ID: 1HLC, (2), RMSD: 0.50 Å]. (c) Comparison with galectin-3 [PDB-ID: 1KJL, (3), RMSD: 0.29 Å] (d) Comparison with galectin-4 [PDB-ID: 1X50 (4), RMSD: 1.50 Å.] (e) Comparison with galectin-7 [PDB-ID: 4GAL, (5), RMSD: 0.42 Å].

**Fig. S2. Comparison of the crystal structures of galectin-1, -2, -3, -4, -7, and -8N** A, overall structure of galectin-8N. The loop region between S3 and S4 is indicated by the pink circle. The bound lactose is shown in yellow in the stick model. B, Comparison of the loop-region crystal structures. Superimposition of the backbone structures of galectin-8N (blue green), galectin-1 (pink), galectin-2 (yellow green), galectin-3 (light blue), galectin-4N (red), and galectin-7 (orange). Arg59 of galectin-8N is shown in the stick model. Amino acids in the loop region are shown in the line model.

**Fig. S3. The omit electron-density maps with the bound (a) lactose, (b) 3'sulfoL, (c) 3'SL and (d) LNF-III.** Contours are shown at  $3.0\sigma$  level. Carbon, oxygen, and nitrogen atoms are shown in *green, red, and blue* respectively.

**Fig. S4. Relative binding abilities of the wild and mutant galectin-8N, galectin-4N, and galectin-3 for various oligosaccharides.** The relative binding abilities of the wild and mutant galectin-8N were calculated by dividing the  $K_D$  value between Lac-O-pNP and galectin-8N by the  $K_D$  values for the oligosaccharides. The relative binding abilities of galectin-4N for oligosaccharides were calculated in the same manner. The relative affinities of galectin-3 were calculated by dividing the concentration (M) of lac-pNP yielding 50% inhibition by the concentration (M) of the oligosaccharides yielding 50% inhibition.

### Supplemental references

1. Lo'pez-Lucendo, M. I. F., Soli's, D., Andre', S., Hirabayashi, J., Kasai, K., Kaltner, H., Gabius, H. and Romero, A. (2004) *J. Mol. Biol.*, **343**, 957–970.
2. Lobsanov, Y.D., Gitt, M.A., Leffler, H., Barondes, S.H., and Rini, J.M. (1993) *J. Biol. Chem.* **268**, 27034-27038.
3. Sorme, P., Arnoux, P., Kahl-Knutsson, B., Leffler, H., Rini, J. M. and Nilsson, U. J. (2005) *J. Am. Chem. Soc.*, **127**, 1737-1743.
4. Tomizawa, T., Kigawa, T., Saito, K., Koshiya, S., Inoue, M. and Yokoyama, S. Solution structure of the C-terminal Gal-bind lectin domain from human galectin-4. To be published.
5. Leonidas, D.D., Vatzaki, E.H., Vorum, H., Celis, J.E., Madsen, P., and Acharya, K.R. (1998) *Biochemistry* **37**, 13930-13940.
